# Supplementary material for: MS-CASPT2 studies on the mechanistic photophysics of tellurium-substituted guanine and cytosine
Source: Royal Society of Chemistry journal article supplement (doi:10.1039/d1cp01142a), 2021-01-01
Supplement: d1cp01142a1.pdf [file d1cp01142a1.pdf]

## **Supporting Information: MS-CASPT2 Studies on Mechanistic Photophysics of Tellurium-Substituted Guanine and Cytosine**

Yun-Hua Zhu<sup>1</sup>, Teng-Shuo Zhang<sup>3</sup>, Xiu-Fang Tang<sup>2</sup>, Bin-Bin Xie<sup>2\*</sup>, and Ganglong Cui<sup>1\*</sup>

- 1) Key Laboratory of Theoretical and Computational Photochemistry, Ministry of Education College of Chemistry, Beijing Normal University, Beijing 100875, P. R. China*
- 2) Hangzhou Institute of Advanced Studies, Zhejiang Normal University, 1108 Gengwen Road, Hangzhou 311231, Zhejiang, P. R. China*
- 3) College of Chemical Engineering, Zhejiang University of Technology, Hangzhou, Zhejiang, China*

---

\*Author to whom correspondence should be addressed. Email: [binbinxie@zjnu.edu.cn](mailto:binbinxie@zjnu.edu.cn);  
[ganglong.cui@bnu.edu.cn](mailto:ganglong.cui@bnu.edu.cn).

## **Table of Contents**

1. Active Spaces for TeC and TeG Systems
2. The Choice of Active Spaces for TeG
3. The Explicit Spin-Orbit Coupled Calculations
4. Comparison with Different Chalcogen Substitutions
5. Additional Proposed Excited-State Decay Paths of TeG and TeC Calculated at the MS-CASPT2 Level
6. Cartesian Coordinates for Critical Structures Optimized at the MS-CASPT2 Level

## 1. Active Spaces for TeC and TeG Systems

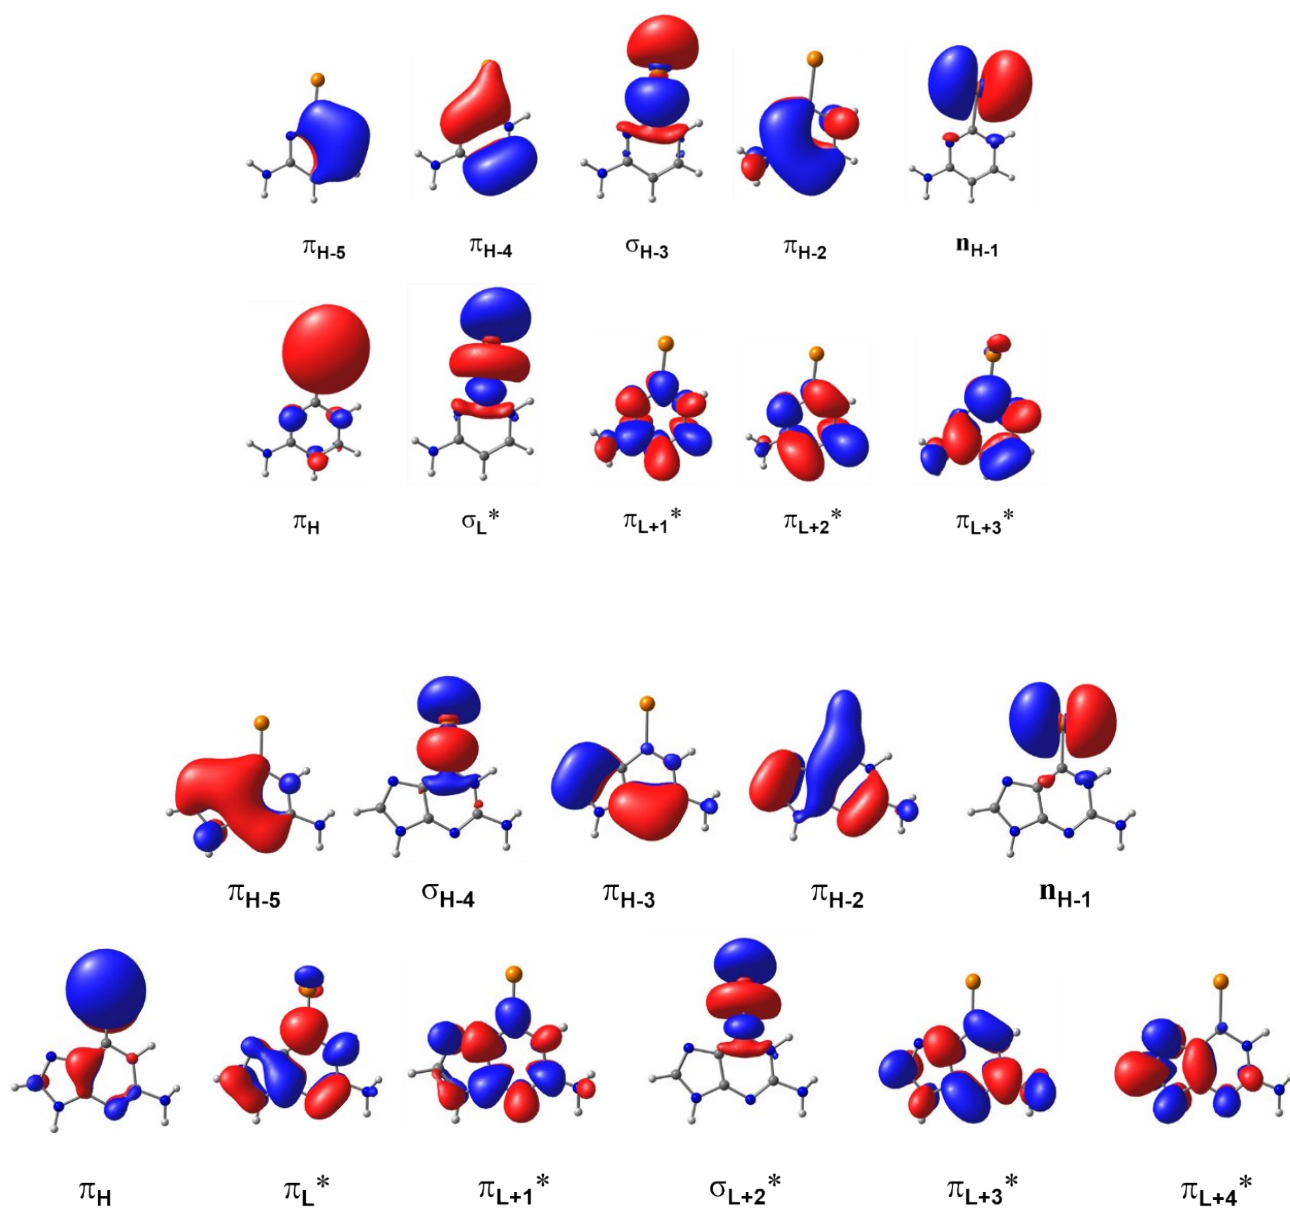

**Figure S1.** Molecular orbitals of TeC (top) and TeG (bottom) used as active spaces in the MS-CASPT2 calculations.

## 2. The Choice of Active Spaces for TeG

**Table S1.** Vertical excitation energies at MS-CASPT2-optimized  $S_0$  minima of TeG with different active spaces.

| States          | (12,10) <sup>top</sup> | (12,10) <sup>middle</sup> | (14,12) <sup>bottom</sup> |
|-----------------|------------------------|---------------------------|---------------------------|
| $S_1(n\pi^*)$   | 53.9                   | 58.4                      | 52.8                      |
| $S_2(\pi\pi^*)$ | 65.9                   | 67.0                      | 64.3                      |
| $T_1(\pi\pi^*)$ | 49.1                   | 52.7                      | 47.4                      |
| $T_2(n\pi^*)$   | 53.3                   | 57.5                      | 52.2                      |
| $T_3(\pi\pi^*)$ | 79.5                   | 84.1                      | 78.9                      |

The superscripts of “top”, “middle” and “bottom” refer to the different active spaces of TeG in Fig. S2.

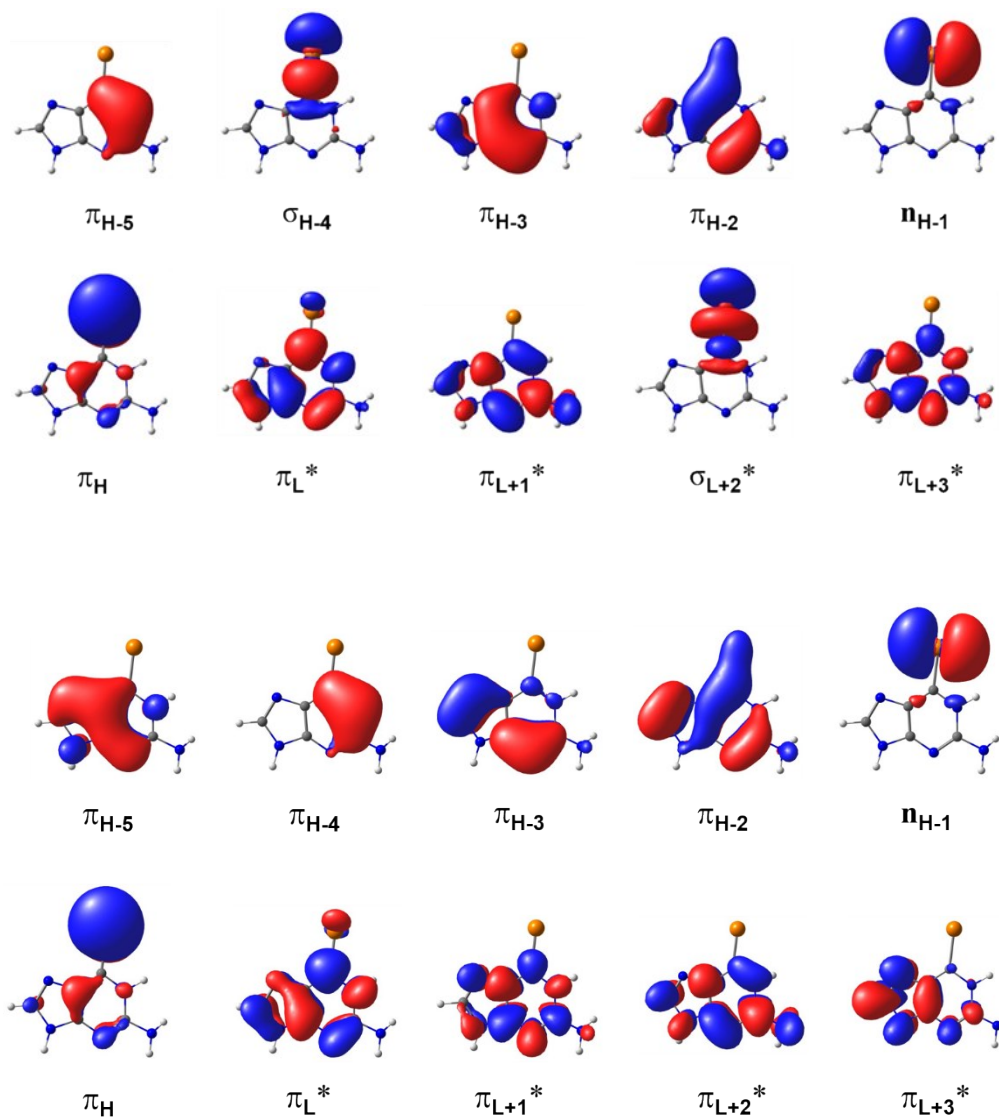

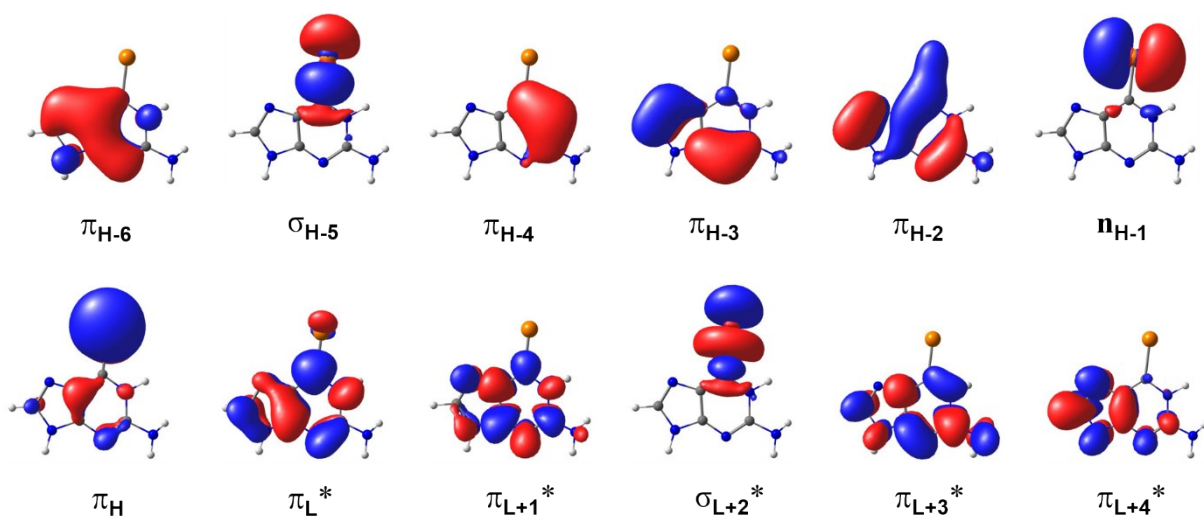

**Figure S2.** Molecular orbitals of TeG used as different active spaces (12,10)-(top), (12,10)-(middle), (14,12)-(bottom) in the MS-CASPT2 calculations.

### 3. The Explicit Spin-Orbit Coupled Calculations

**Table S2.** The absorption energies and oscillator strengths of  $S_0 \rightarrow T_n$  calculated with different density functionals.

| Structures | States         | cam-b3lyp   |                        | wb97x-v     |                        |
|------------|----------------|-------------|------------------------|-------------|------------------------|
|            |                | Energy (eV) | Osc.                   | Energy (eV) | Osc.                   |
| TeG        | S <sub>1</sub> | 2.47        | 0.17*10 <sup>-04</sup> | 2.65        | 0.14*10 <sup>-04</sup> |
|            | S <sub>2</sub> | 3.29        | 0.32                   | 3.36        | 0.34                   |
|            | T <sub>1</sub> | 1.65        | 0.30*10 <sup>-05</sup> | 1.69        | 0.35*10 <sup>-05</sup> |
|            | T <sub>2</sub> | 2.16        | 0.89*10 <sup>-02</sup> | 2.35        | 0.12*10 <sup>-01</sup> |
|            | T <sub>3</sub> | 3.38        | 0.16*10 <sup>-02</sup> | 3.62        | 0.12*10 <sup>-03</sup> |
| TeC        | S <sub>1</sub> | 2.71        | 0.67*10 <sup>-04</sup> | 2.93        | 0.66*10 <sup>-04</sup> |
|            | S <sub>2</sub> | 2.95        | 0.22*10 <sup>-01</sup> | 3.42        | 0.13                   |
|            | T <sub>1</sub> | 2.00        | 0.13*10 <sup>-04</sup> | 2.12        | 0.14*10 <sup>-04</sup> |
|            | T <sub>2</sub> | 2.40        | 0.68*10 <sup>-02</sup> | 2.64        | 0.72*10 <sup>-02</sup> |
|            | T <sub>3</sub> | 2.67        | 0.25*10 <sup>-03</sup> | 3.07        | 0.76*10 <sup>-03</sup> |

Oscillator strengths are evaluated by the TD-DFT method with the zero-order regular approximation to account for the scalar relativistic effects.

## 4. Comparison with Different Chalcogen Substitutions

**Table S3.** Vertical excitation energies at  $S_0$  minima of guanine and cytosine with different chalcogen atom substitutions (units: eV).

| States          | TeG <sup>a</sup> | SeG <sup>b</sup> | TG <sup>c</sup> | G <sup>d</sup>             | TeC <sup>a</sup> | TC <sup>e</sup>    | C <sup>f</sup>             |
|-----------------|------------------|------------------|-----------------|----------------------------|------------------|--------------------|----------------------------|
| $S_1(n\pi^*)$   | 2.32             | 2.61             | 3.36            | <b>4.93</b> ( $\pi\pi^*$ ) | 2.52             | 3.65               | <b>4.68</b> ( $\pi\pi^*$ ) |
| $S_2(\pi\pi^*)$ | <b>2.84</b>      | <b>3.39</b>      | <b>4.05</b>     | 5.54( $n\pi^*$ )           | <b>2.78</b>      | <b>3.74</b>        | 5.12( $n\pi^*$ )           |
| $T_1(\pi\pi^*)$ | 2.14             | 2.40             | 3.10            | -                          | 2.35             | 3.37               | -                          |
| $T_2(n\pi^*)$   | 2.30             | 2.56             | 3.31            | -                          | 2.48             | 3.47( $\pi\pi^*$ ) | -                          |
| $T_3(\pi\pi^*)$ | 3.51             | -                | 4.24            | -                          | 2.72             | 3.64( $n\pi^*$ )   | -                          |

<sup>a</sup> This work. <sup>b</sup> *ACS Omega* 2019, 4, 9769–9777. <sup>c</sup> *Chem. Commun.* 2012, 48, 2134–2136. <sup>d</sup> *J. Am. Chem. Soc.* 2008, 130, 2473-2484. <sup>e</sup> *Nat. Commun.* 2016, 7, 13077. <sup>f</sup> *J. Chem. Phys.* 2008, 128, 134110.

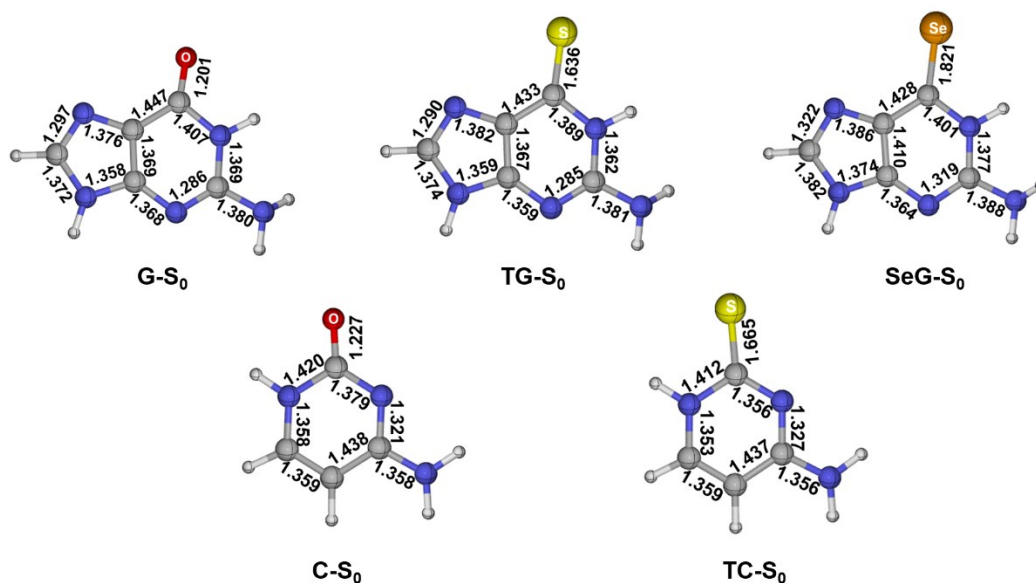

**Figure S3.** Ground-state equilibrium structures of G (top) and C (bottom) with different heavy atom substitutions. Also shown are the selected bond lengths (in Å).

**Table S4.** The spin-orbit constants ( $\text{cm}^{-1}$ ) and intersystem crossing rates ( $\text{s}^{-1}$ ) of guanine and cytosine with different chalcogen atom substitutions in the Franck-Condon approximation based on the MS-CASPT2 calculations.

| Systems                          | Structures                     | States                    | SOC            | ISC            |
|----------------------------------|--------------------------------|---------------------------|----------------|----------------|
| TC <sup>a</sup>                  | MECP ${}^1n\pi^*/{}^3\pi\pi^*$ | ${}^1n\pi^*/{}^3\pi\pi^*$ | 160            | $3.75*10^{14}$ |
|                                  | MECP ${}^1\pi\pi^*/{}^3n\pi^*$ | ${}^1\pi\pi^*/{}^3n\pi^*$ | 170            | $4.24*10^{14}$ |
| TeC <sup>b</sup>                 | $(S_2/S_1/T_2/T_1)_P$          | $S_2/T_2$                 | 992            | $1.70*10^{16}$ |
|                                  | $(S_2/S_1/T_2)_T$              | $S_2/T_2$                 | 849            | $5.80*10^{14}$ |
|                                  | $(T_2/T_1/S_0)_T$              | $T_1/S_0$                 | 1028           | $3.60*10^{15}$ |
|                                  | $T_{3P}$                       | $S_2/T_3$                 | 292            | $1.50*10^{14}$ |
|                                  | $S_{1P}$                       | $S_1/T_1$                 | 768            | $4.00*10^{15}$ |
|                                  |                                | $S_1/T_2$                 | 619            | $3.20*10^{15}$ |
|                                  | $S_{1T}$                       | $S_1/T_1$                 | 795            | $7.90*10^{14}$ |
| $S_1/T_2$                        |                                | 591                       | $7.40*10^{14}$ |                |
| TG <sup>c</sup>                  | $S_0$                          | $S_2/T_2$                 | 100            | $2.10*10^{12}$ |
|                                  | $S_1/T_2$                      | $S_1/T_2$                 | 200            | $2.93*10^{13}$ |
|                                  | $T_1/S_0$                      | $T_1({}^3n\pi^*)/S_0$     | 270            | $2.14*10^{13}$ |
|                                  | $T_1/S_0$                      | $T_1({}^3\pi\pi^*)/S_0$   | 12             | $2.64*10^{11}$ |
| SeG<br>in gas phase <sup>d</sup> | $S_1$ -MIN                     | $S_1/T_1$                 | 437            | $4.67*10^{14}$ |
|                                  |                                | $S_1/T_2$                 | 14             | $1.44*10^{12}$ |
|                                  | $S_2/S_1/T_2$                  | $S_2/T_2$                 | 435            | $1.39*10^{15}$ |
|                                  | $S_0/T_1$                      | $T_1/S_0$                 | 252            | $7.16*10^{13}$ |
| SeG<br>in water <sup>e</sup>     | $S_2/S_1/T_2$                  | $S_2/T_2$                 | 440            | $5.68*10^{14}$ |
|                                  | $S_1/T_1/T_2$                  | $S_1/T_1$                 | 380            | $3.03*10^{14}$ |
|                                  |                                | $S_1/T_2$                 | 155            | $5.87*10^{13}$ |
| $T_1/S_0$                        | $T_1/S_0$                      | 283                       | $3.56*10^{13}$ |                |
| SeG<br>in DNA <sup>e</sup>       | $S_1$ -MIN                     | $S_1/T_1$                 | 399            | $1.17*10^{14}$ |
|                                  |                                | $S_1/T_2$                 | 93             | $6.34*10^{12}$ |
|                                  | $T_1/S_0$                      | $T_1/S_0$                 | 273            | $2.73*10^{14}$ |
| TeG <sup>b</sup>                 | $(S_2/S_1/T_2)_P$              | $S_2/T_2$                 | 906            | $2.10*10^{15}$ |
|                                  | $(T_1/S_0)_T$                  | $T_1/S_0$                 | 694            | $2.50*10^{14}$ |
|                                  | $S_{1P}$                       | $S_1/T_1$                 | 888            | $1.20*10^{15}$ |
|                                  |                                | $S_1/T_2$                 | 359            | $1.10*10^{15}$ |
|                                  | $S_{1T}$                       | $S_1/T_1$                 | 953            | $1.20*10^{15}$ |
| $S_1/T_2$                        |                                | 20                        | $1.00*10^{12}$ |                |



<sup>a</sup> *Nat. Commun.* 2016, 7, 13077. <sup>b</sup> This work. <sup>c</sup> *Chem. Commun.* 2012, 48, 2134–2136. *Chem. Sci.* 2014, 5, 1336–1347. <sup>d</sup> *ACS Omega* 2019, 4, 9769–9777. <sup>e</sup> *J. Phys. Chem. B* 2021, 125, 1778–1789

## 5. Additional Proposed Excited-State Relaxation Paths of TeG and TeC Calculated at the MS-CASPT2 Level

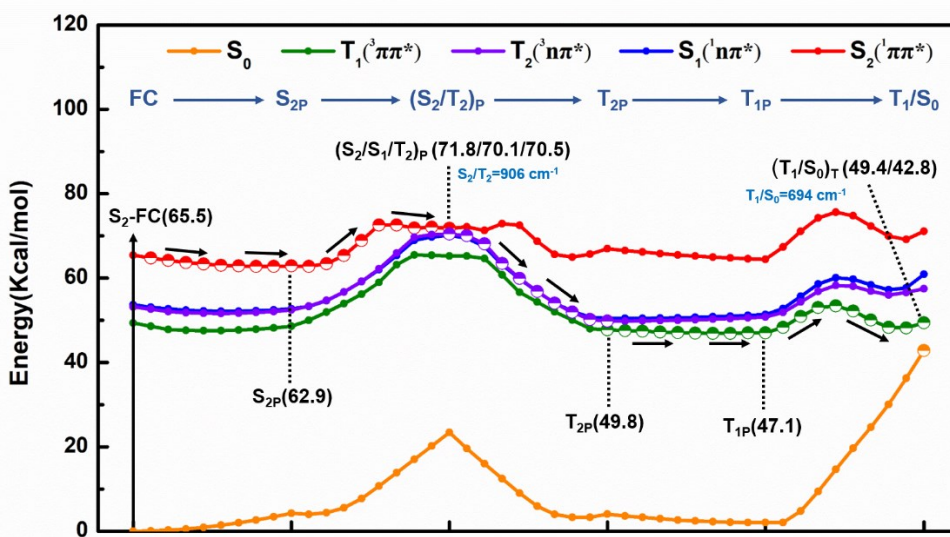

**Figure S4.** The proposed excited-state relaxation pathways of TeG based on the MS-CASPT2 calculated LIIC paths (in kcal/mol).

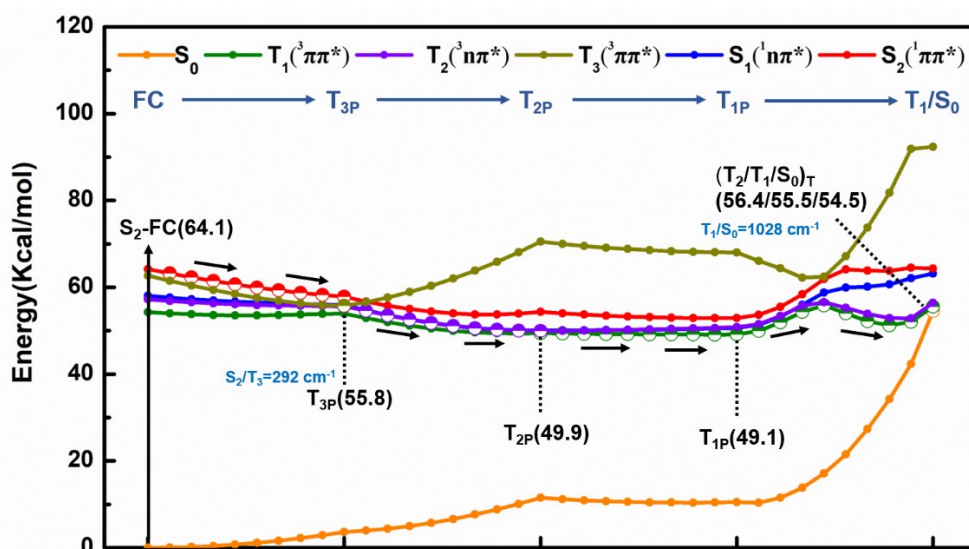

**Figure S5.** The proposed excited-state relaxation pathways of TeC based on the MS-CASPT2 calculated LIIC paths (in kcal/mol).

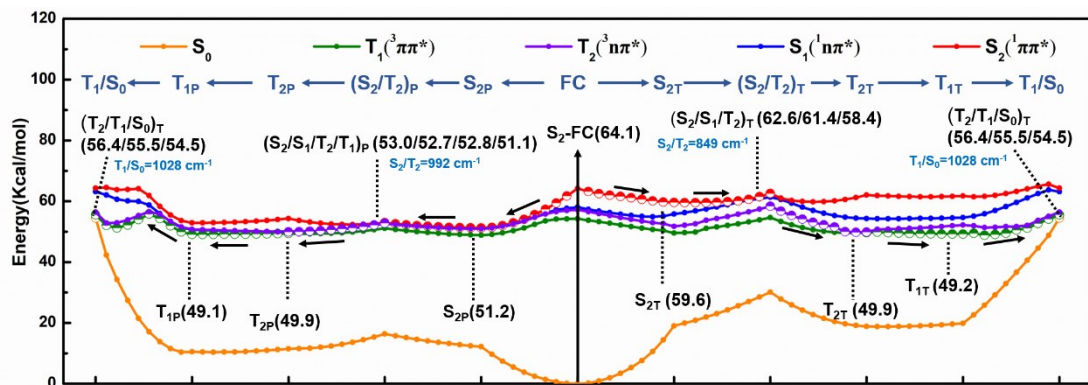

**Figure S6.** The proposed excited-state relaxation pathways of TeC based on the MS-CASPT2 calculated LIIC paths (in kcal/mol).

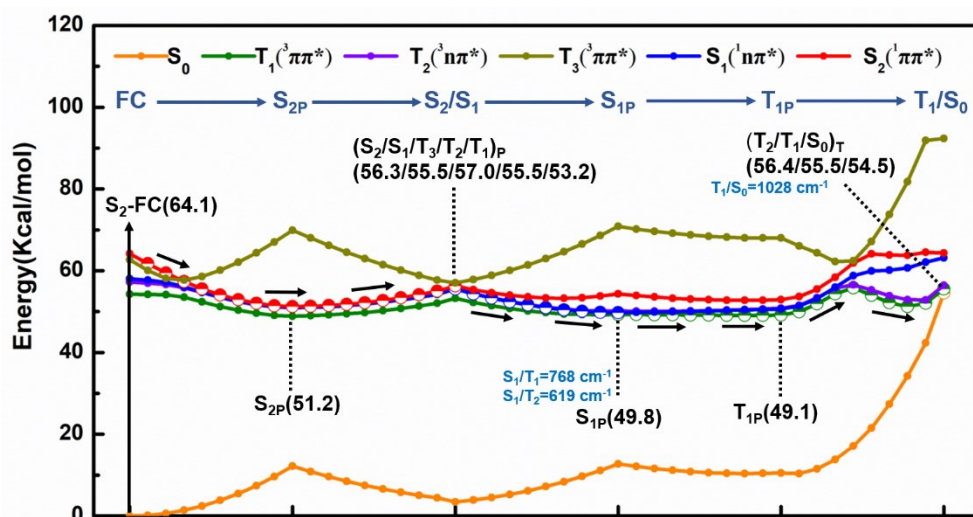

**Figure S7.** The proposed excited-state relaxation pathways of TeC based on the MS-CASPT2 calculated LIIC paths (in kcal/mol).

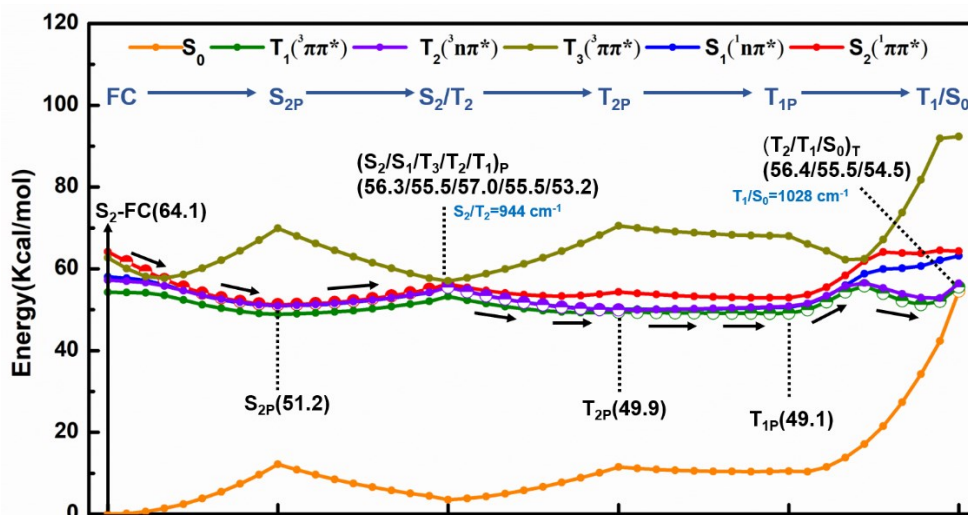

**Figure S8.** The proposed excited-state relaxation pathways of TeC based on the MS-CASPT2 calculated LIIC paths (in kcal/mol).

## 6. Cartesian Coordinates for Critical Structures Optimized at the MS-CASPT2 Level (Unit: Angstrom)

TeG

S<sub>0</sub>

|    |             |             |             |
|----|-------------|-------------|-------------|
| C  | -2.35911727 | -0.55592892 | 0.02671339  |
| C  | -0.95418872 | -0.41040103 | -0.01460104 |
| C  | -0.99696900 | 1.80318030  | 0.04049956  |
| C  | -3.15118232 | 0.60416823  | 0.12098135  |
| C  | -1.56904516 | -2.52861933 | -0.09028575 |
| H  | -2.88692519 | 2.62267474  | 0.23103670  |
| H  | 0.50494729  | -1.95177130 | -0.12905934 |
| N  | -2.36665327 | 1.75853835  | 0.10714457  |
| N  | -0.42031171 | 3.05969860  | 0.14684376  |
| H  | 0.56994432  | 3.01445893  | -0.06405144 |
| H  | -0.87658700 | 3.77735693  | -0.40519712 |
| N  | -0.22785140 | 0.72371813  | -0.01233671 |
| N  | -2.71676425 | -1.89401487 | -0.02019242 |
| N  | -0.46812210 | -1.68900581 | -0.08747516 |
| Te | -5.15604481 | 0.77451358  | 0.29469081  |
| H  | -1.45521297 | -3.60224601 | -0.14547642 |

S<sub>2T</sub>

|   |             |             |             |
|---|-------------|-------------|-------------|
| C | -2.36343602 | -0.57084319 | 0.16031523  |
| C | -0.93777593 | -0.41241646 | -0.00466605 |
| C | -1.01358596 | 1.81485457  | 0.08433739  |
| C | -3.11920535 | 0.58145987  | 0.33811278  |
| C | -1.56290691 | -2.54097851 | -0.05819013 |
| H | -2.84662176 | 2.62968226  | 0.49889912  |

|    |             |             |             |
|----|-------------|-------------|-------------|
| H  | 0.49553009  | -1.95187809 | -0.27838644 |
| N  | -2.36155894 | 1.77037880  | 0.26803201  |
| N  | -0.41925493 | 3.06796048  | 0.08725161  |
| H  | 0.54593683  | 3.00378092  | -0.21345540 |
| H  | -0.91931071 | 3.76828196  | -0.45059347 |
| N  | -0.23934704 | 0.72096432  | -0.06932526 |
| N  | -2.71176867 | -1.90838604 | 0.10773336  |
| N  | -0.46636774 | -1.68994038 | -0.12660918 |
| Te | -5.16388000 | 0.83474240  | -0.19964198 |
| H  | -1.44653051 | -3.61134237 | -0.14457884 |

S<sub>1T</sub>

|    |             |             |             |
|----|-------------|-------------|-------------|
| C  | -2.35110209 | -0.54956985 | 0.12170233  |
| C  | -0.97003375 | -0.41139116 | -0.01925439 |
| C  | -0.99682851 | 1.80936610  | 0.03937288  |
| C  | -3.12922123 | 0.60755516  | 0.28369010  |
| C  | -1.57550852 | -2.53145276 | -0.05667015 |
| H  | -2.76611896 | 2.64611906  | 0.56647559  |
| H  | 0.47581284  | -1.95124553 | -0.24600035 |
| N  | -2.36782381 | 1.80531282  | 0.16892611  |
| N  | -0.42241060 | 3.07462097  | 0.10503425  |
| H  | 0.56508706  | 3.02048986  | -0.11447354 |
| H  | -0.88332986 | 3.75592630  | -0.48757934 |
| N  | -0.23797650 | 0.75089873  | -0.09156199 |
| N  | -2.72199290 | -1.87642525 | 0.09111219  |
| N  | -0.49027461 | -1.68983991 | -0.12483360 |
| Te | -5.18822171 | 0.65059402  | -0.11831870 |
| H  | -1.47014036 | -3.60463801 | -0.11838669 |

T<sub>2T</sub>

|    |             |             |             |
|----|-------------|-------------|-------------|
| C  | -2.34526389 | -0.54809403 | 0.16359194  |
| C  | -0.97232074 | -0.40986377 | -0.01325107 |
| C  | -0.99891499 | 1.80543492  | 0.04878454  |
| C  | -3.13231479 | 0.60756023  | 0.36887037  |
| C  | -1.57921499 | -2.52937061 | -0.04997839 |
| H  | -2.75980239 | 2.64978822  | 0.59054446  |
| H  | 0.46707491  | -1.94336323 | -0.29787626 |
| N  | -2.35892079 | 1.79235225  | 0.23322499  |
| N  | -0.42160134 | 3.06932010  | 0.09453473  |
| H  | 0.55440278  | 3.01418849  | -0.17155825 |
| H  | -0.90899792 | 3.75948992  | -0.46569234 |
| N  | -0.23924232 | 0.74777234  | -0.10141780 |
| N  | -2.71839318 | -1.87372738 | 0.13431020  |
| N  | -0.49503396 | -1.68584825 | -0.14058984 |
| Te | -5.14560271 | 0.65301605  | -0.27086539 |
| H  | -1.47593722 | -3.60233473 | -0.12339716 |

T<sub>1T</sub>

|   |             |             |             |
|---|-------------|-------------|-------------|
| C | -2.36193616 | -0.56044946 | 0.17408225  |
| C | -0.97546951 | -0.41156174 | -0.02956373 |
| C | -1.00753151 | 1.80582927  | 0.06613723  |
| C | -3.14713610 | 0.60084611  | 0.39982846  |
| C | -1.56894249 | -2.53237432 | -0.03807605 |
| H | -2.80018894 | 2.65912128  | 0.48366595  |
| H | 0.47122215  | -1.93485588 | -0.31725910 |
| N | -2.34603506 | 1.78306823  | 0.26273974  |

|    |             |             |             |
|----|-------------|-------------|-------------|
| N  | -0.39802588 | 3.04824064  | 0.09678807  |
| H  | 0.54947599  | 2.99366600  | -0.25540818 |
| H  | -0.92266938 | 3.79304531  | -0.34435886 |
| N  | -0.24459676 | 0.73410116  | -0.09821163 |
| N  | -2.71114721 | -1.89093907 | 0.16054604  |
| N  | -0.49171384 | -1.68393126 | -0.15358060 |
| Te | -5.11681758 | 0.70778150  | -0.29972515 |
| H  | -1.45857124 | -3.60526723 | -0.10836967 |

S<sub>2P</sub>

|    |             |             |             |
|----|-------------|-------------|-------------|
| C  | -2.36178791 | -0.56617830 | 0.01842783  |
| C  | -0.94808694 | -0.41989537 | -0.02789288 |
| C  | -1.00751990 | 1.80824613  | 0.04364620  |
| C  | -3.12473714 | 0.58639720  | 0.07719721  |
| C  | -1.55153023 | -2.53818615 | -0.07603858 |
| H  | -2.88229766 | 2.64745096  | 0.25526651  |
| H  | 0.51025161  | -1.95583590 | -0.13686111 |
| N  | -2.36935003 | 1.78520303  | 0.10531767  |
| N  | -0.40278319 | 3.04486948  | 0.13945308  |
| H  | 0.58164289  | 2.99459246  | -0.08972514 |
| H  | -0.87229827 | 3.79729858  | -0.34773462 |
| N  | -0.24406596 | 0.73052626  | -0.03587623 |
| N  | -2.71095040 | -1.90325643 | -0.01007282 |
| N  | -0.46249515 | -1.69145871 | -0.09078191 |
| Te | -5.25329876 | 0.79778654  | 0.29098287  |
| H  | -1.43077654 | -3.61123927 | -0.11607334 |

S<sub>1P</sub>

|    |             |             |             |
|----|-------------|-------------|-------------|
| C  | -2.35853089 | -0.55108256 | -0.00845578 |
| C  | -0.97295147 | -0.41190710 | -0.04172268 |
| C  | -0.99683885 | 1.81077768  | 0.02091673  |
| C  | -3.14431873 | 0.61655945  | -0.01046927 |
| C  | -1.56641652 | -2.53319662 | -0.06276296 |
| H  | -2.79980704 | 2.63550880  | 0.49718032  |
| H  | 0.48949416  | -1.95515319 | -0.11599044 |
| N  | -2.37386590 | 1.81060963  | 0.09738766  |
| N  | -0.42684203 | 3.07625878  | 0.13579241  |
| H  | 0.57433278  | 3.01947301  | -0.01028334 |
| H  | -0.84087811 | 3.75651734  | -0.49176446 |
| N  | -0.24070207 | 0.75384116  | -0.08972682 |
| N  | -2.72303008 | -1.88017805 | -0.02093206 |
| N  | -0.48342344 | -1.69292370 | -0.08103468 |
| Te | -5.21022499 | 0.65886889  | 0.26034893  |
| H  | -1.45608041 | -3.60765300 | -0.07924883 |

T<sub>2P</sub>

|   |             |             |             |
|---|-------------|-------------|-------------|
| C | -2.35634120 | -0.55607985 | 0.01726855  |
| C | -0.97336936 | -0.41343705 | -0.03430209 |
| C | -0.99827610 | 1.80386464  | 0.05889757  |
| C | -3.15206377 | 0.60784203  | 0.01853138  |
| C | -1.56144366 | -2.53711059 | -0.07354865 |
| H | -2.80869679 | 2.66036406  | 0.35522011  |
| H | 0.49173953  | -1.94776010 | -0.14505502 |
| N | -2.36370242 | 1.78802504  | 0.11654738  |
| N | -0.43773375 | 3.07583281  | 0.15207907  |
| H | 0.56211429  | 3.01591872  | -0.00012815 |



|    |             |             |             |
|----|-------------|-------------|-------------|
| H  | -0.85216950 | 3.73905098  | -0.49391733 |
| N  | -0.23194183 | 0.75072850  | -0.05359618 |
| N  | -2.71633799 | -1.88443021 | -0.00473672 |
| N  | -0.48214585 | -1.69188265 | -0.09516191 |
| Te | -5.20203126 | 0.70601129  | 0.28943260  |
| H  | -1.44768391 | -3.61061709 | -0.10829586 |

$T_{IP}$

|    |             |             |             |
|----|-------------|-------------|-------------|
| C  | -2.37071564 | -0.57030402 | 0.02348285  |
| C  | -0.96837082 | -0.41985530 | -0.02032269 |
| C  | -1.01178773 | 1.80939834  | 0.04780367  |
| C  | -3.14394123 | 0.59295736  | 0.10004246  |
| C  | -1.55289815 | -2.54510910 | -0.08385603 |
| H  | -2.85867730 | 2.65093641  | 0.24219003  |
| H  | 0.50136588  | -1.94145685 | -0.13785688 |
| N  | -2.35701574 | 1.78421730  | 0.10893779  |
| N  | -0.41467016 | 3.05727087  | 0.14802084  |
| H  | 0.57141627  | 3.00020039  | -0.07371037 |
| H  | -0.87188099 | 3.78439972  | -0.38838943 |
| N  | -0.23589260 | 0.73496751  | -0.02078223 |
| N  | -2.71639491 | -1.89919082 | -0.01501034 |
| N  | -0.47432010 | -1.69048023 | -0.09098562 |
| Te | -5.19438286 | 0.77541344  | 0.29010212  |
| H  | -1.43191751 | -3.61704451 | -0.13043144 |

$(S_2/S_1)_T$

|   |             |             |             |
|---|-------------|-------------|-------------|
| C | -2.34362276 | -0.56708091 | 0.35848454  |
| C | -0.95517777 | -0.40521329 | -0.04735560 |

|    |             |             |             |
|----|-------------|-------------|-------------|
| C  | -1.02879165 | 1.80375151  | 0.11830553  |
| C  | -3.08390399 | 0.56360369  | 0.68883392  |
| C  | -1.57959908 | -2.52983403 | 0.00152852  |
| H  | -2.84743530 | 2.58576972  | 0.56477013  |
| H  | 0.40828170  | -1.91893663 | -0.60237223 |
| N  | -2.30846362 | 1.72750647  | 0.48049395  |
| N  | -0.42865254 | 3.02768272  | 0.02019821  |
| H  | 0.41672505  | 3.02701395  | -0.53296642 |
| H  | -1.02696505 | 3.82840223  | -0.12444604 |
| N  | -0.27310449 | 0.71381015  | -0.15700276 |
| N  | -2.67117658 | -1.91384815 | 0.38081941  |
| N  | -0.51182115 | -1.66441625 | -0.27272644 |
| Te | -4.82754547 | 0.82590927  | -0.76139202 |
| H  | -1.46883077 | -3.59779996 | -0.11593799 |

$(S_2/S_1/T_2)_P$

|   |             |             |             |
|---|-------------|-------------|-------------|
| C | -2.38876576 | -0.56292390 | -0.09203005 |
| C | -0.94733132 | -0.37309519 | -0.16219518 |
| C | -1.09998298 | 1.87934025  | -0.31103346 |
| C | -3.13200187 | 0.59250838  | 0.14741637  |
| C | -1.55500601 | -2.51811551 | -0.06793681 |
| H | -2.92147460 | 2.60814590  | 0.33740660  |
| H | 0.51318093  | -1.92349557 | -0.18266507 |
| N | -2.43637711 | 1.75088384  | 0.09632653  |
| N | -0.57730654 | 3.16889170  | -0.03404130 |
| H | 0.00621113  | 3.14653044  | 0.80518513  |
| H | 0.02725210  | 3.46677210  | -0.79344633 |
| N | -0.26882986 | 0.73646958  | -0.22055491 |

|    |             |             |             |
|----|-------------|-------------|-------------|
| N  | -2.71634258 | -1.90555277 | -0.04053147 |
| N  | -0.45845518 | -1.66298392 | -0.11745401 |
| Te | -5.14830063 | 0.69361369  | 0.69059286  |
| H  | -1.42655319 | -3.59066845 | -0.05580417 |

$(S_1/T_2/T_1)_P$

|    |             |             |             |
|----|-------------|-------------|-------------|
| C  | -2.36578639 | -0.55525643 | 0.08718266  |
| C  | -0.92506404 | -0.39534920 | -0.01629288 |
| C  | -1.01555568 | 1.83869745  | 0.11188001  |
| C  | -3.12783169 | 0.59680736  | 0.20182300  |
| C  | -1.56859626 | -2.52100997 | -0.10444352 |
| H  | -2.89179884 | 2.63390701  | 0.44266806  |
| H  | 0.50422418  | -1.96942350 | -0.23874092 |
| N  | -2.40603788 | 1.77787222  | 0.20646328  |
| N  | -0.49395296 | 3.14448178  | 0.06711892  |
| H  | 0.50811859  | 3.10244623  | 0.22566283  |
| H  | -0.63675020 | 3.57739676  | -0.84779381 |
| N  | -0.24419876 | 0.73326781  | -0.03486055 |
| N  | -2.71775342 | -1.89044739 | 0.01833475  |
| N  | -0.45741079 | -1.69229247 | -0.12270828 |
| Te | -5.22697723 | 0.71933091  | 0.18510141  |
| H  | -1.46471212 | -3.59410805 | -0.18216028 |

$(S_1/T_2/T_1)_T$

|   |             |             |             |
|---|-------------|-------------|-------------|
| C | -2.34508239 | -0.55109301 | 0.13933301  |
| C | -0.99021965 | -0.41248286 | -0.04915512 |
| C | -0.98493303 | 1.78992227  | 0.06499521  |
| C | -3.12085756 | 0.60842052  | 0.39216078  |

|    |             |             |             |
|----|-------------|-------------|-------------|
| C  | -1.56123847 | -2.51708146 | -0.04135259 |
| H  | -2.74027246 | 2.62268203  | 0.58869820  |
| H  | 0.46216604  | -1.93144192 | -0.27982171 |
| N  | -2.33274815 | 1.77847804  | 0.26558745  |
| N  | -0.41561332 | 3.04786910  | 0.08250905  |
| H  | 0.54326335  | 3.02064635  | -0.18375048 |
| H  | -0.92131177 | 3.72613826  | -0.44272816 |
| N  | -0.26509780 | 0.75273736  | -0.11543627 |
| N  | -2.67929679 | -1.89630411 | 0.13375038  |
| N  | -0.48685892 | -1.68073383 | -0.15739311 |
| Te | -5.23697479 | 0.72825638  | -0.30448663 |
| H  | -1.45500783 | -3.57969262 | -0.09367527 |

$(T_1/S_0)_T$

|   |             |             |             |
|---|-------------|-------------|-------------|
| C | 0.40556039  | -0.83424791 | 0.24583788  |
| C | 1.72214063  | -0.39803160 | -0.01443787 |
| C | 1.24919933  | 1.75256623  | 0.14601030  |
| C | -0.63571852 | 0.14260726  | 0.51166920  |
| C | 1.59480012  | -2.60137887 | 0.05873986  |
| H | -0.65300545 | 2.21543995  | 0.64052407  |
| H | 3.45367855  | -1.58168297 | -0.30799529 |
| N | -0.03598264 | 1.44210808  | 0.43796978  |
| N | 1.58574643  | 3.09290187  | 0.17895359  |
| H | 2.49788339  | 3.25722076  | -0.22672481 |
| H | 0.88382196  | 3.73079253  | -0.17178268 |
| N | 2.20383688  | 0.86853124  | -0.09640702 |
| N | 0.35544954  | -2.21676633 | 0.28662465  |
| N | 2.46278755  | -1.53959862 | -0.12180880 |

|    |             |             |             |
|----|-------------|-------------|-------------|
| Te | -1.94831284 | -0.22468900 | -1.21620462 |
| H  | 1.93640085  | -3.62439143 | 0.00849183  |

TeC

S<sub>0</sub>

|    |             |             |             |
|----|-------------|-------------|-------------|
| C  | 0.32305048  | 0.63249821  | -0.13768246 |
| C  | 2.34673419  | 1.76212501  | -0.05472281 |
| C  | 1.71562446  | 3.03700114  | 0.11937552  |
| C  | 0.35427396  | 3.04089714  | 0.10345318  |
| H  | 2.28162538  | 3.95191965  | 0.23376171  |
| H  | -0.24385365 | 3.93887381  | 0.20865585  |
| H  | -1.33489249 | 1.84527125  | -0.03994732 |
| N  | 3.69875359  | 1.68477903  | -0.13207661 |
| H  | 4.26589541  | 2.45325607  | 0.18380209  |
| H  | 4.09919253  | 0.75881642  | -0.10199224 |
| N  | 1.67171379  | 0.62220389  | -0.17544281 |
| N  | -0.32211378 | 1.87549716  | -0.05045143 |
| Te | -0.85050792 | -1.03742573 | -0.16083542 |

S<sub>2P</sub>

|   |             |            |             |
|---|-------------|------------|-------------|
| C | 0.36997554  | 0.68967006 | -0.13139886 |
| C | 2.36837730  | 1.82993847 | -0.08474362 |
| C | 1.72591253  | 3.03423680 | 0.06401883  |
| C | 0.32197092  | 3.08244480 | 0.11737817  |
| H | 2.28923730  | 3.95823761 | 0.13517480  |
| H | -0.28768956 | 3.96448523 | 0.23657302  |
| H | -1.34366085 | 1.78600636 | 0.05428784  |
| N | 3.74597798  | 1.67206308 | -0.23286866 |
| H | 4.29313635  | 2.39310139 | 0.21865315  |
| H | 4.03795665  | 0.74876093 | 0.06508546  |
| N | 1.66690523  | 0.60360932 | -0.19006396 |

|    |             |             |             |
|----|-------------|-------------|-------------|
| N  | -0.33638560 | 1.84784079  | 0.01477377  |
| Te | -0.84621784 | -1.04468179 | -0.27097273 |

S<sub>2T</sub>

|    |             |             |             |
|----|-------------|-------------|-------------|
| C  | -0.55745277 | 0.36033650  | 0.28827193  |
| C  | 1.18977492  | 1.86829652  | 0.07486491  |
| C  | 2.16783830  | 0.84024975  | 0.12912505  |
| C  | 1.72324586  | -0.44796681 | 0.30647753  |
| H  | 3.22552230  | 1.04918735  | 0.03447083  |
| H  | 2.37561406  | -1.31336657 | 0.32000984  |
| H  | 0.02380175  | -1.61603497 | 0.50071389  |
| N  | 1.56234413  | 3.19483637  | 0.05666275  |
| H  | 2.45520076  | 3.40449297  | -0.36550665 |
| H  | 0.81342613  | 3.80633050  | -0.24287035 |
| N  | -0.12655379 | 1.61757602  | 0.09932891  |
| N  | 0.39243072  | -0.67775756 | 0.40788512  |
| Te | -2.18017813 | -0.29703124 | -1.05342347 |

S<sub>1P</sub>

|   |             |            |             |
|---|-------------|------------|-------------|
| C | 0.34563502  | 0.70628445 | -0.11140583 |
| C | 2.35756337  | 1.81349515 | -0.08601309 |
| C | 1.71021702  | 3.03645229 | 0.06052195  |
| C | 0.33079089  | 3.09559780 | 0.14121823  |
| H | 2.28185614  | 3.95766730 | 0.10737730  |
| H | -0.25614200 | 3.98929119 | 0.29391364  |
| H | -1.35434577 | 1.86289034 | -0.13685214 |
| N | 3.74452686  | 1.67106928 | -0.25592479 |
| H | 4.27496676  | 2.34317105 | 0.28627974  |

|    |             |             |             |
|----|-------------|-------------|-------------|
| H  | 4.02851235  | 0.73051417  | -0.00497995 |
| N  | 1.63426835  | 0.62122653  | -0.18808775 |
| N  | -0.37707082 | 1.85892550  | 0.11564526  |
| Te | -0.71528225 | -1.12087199 | -0.22579532 |

S<sub>IT</sub>

|    |             |             |             |
|----|-------------|-------------|-------------|
| C  | -0.54544573 | 0.32633708  | 0.12692214  |
| C  | 1.16874140  | 1.86890743  | 0.05614223  |
| C  | 2.17112819  | 0.82505341  | 0.09994538  |
| C  | 1.73941899  | -0.44918842 | 0.27932292  |
| H  | 3.22627490  | 1.04330210  | -0.00534323 |
| H  | 2.40453919  | -1.30427940 | 0.33310640  |
| H  | 0.05782525  | -1.61571572 | 0.68819227  |
| N  | 1.56533851  | 3.20367652  | 0.13764885  |
| H  | 2.43111994  | 3.40333459  | -0.34869572 |
| H  | 0.82264269  | 3.82368352  | -0.16767505 |
| N  | -0.12085957 | 1.59406365  | -0.02776736 |
| N  | 0.39018409  | -0.70075806 | 0.42323397  |
| Te | -2.24589361 | -0.22926786 | -1.03902251 |

T<sub>2P</sub>

|   |             |            |             |
|---|-------------|------------|-------------|
| C | 0.36000102  | 0.70236539 | -0.11915242 |
| C | 2.35888774  | 1.81238933 | -0.07212401 |
| C | 1.70019170  | 3.05189732 | 0.03007082  |
| C | 0.32807783  | 3.10182950 | 0.10695669  |
| H | 2.27463045  | 3.97302592 | 0.03196787  |
| H | -0.27169603 | 3.99133416 | 0.22570469  |
| H | -1.35941445 | 1.84157058 | 0.04227994  |



|    |             |             |             |
|----|-------------|-------------|-------------|
| N  | 3.74856413  | 1.68702931  | -0.21231474 |
| H  | 4.27121345  | 2.30298291  | 0.39972218  |
| H  | 4.02907009  | 0.72494822  | -0.05516547 |
| N  | 1.63693407  | 0.61997246  | -0.21190703 |
| N  | -0.35676092 | 1.86046248  | 0.13918643  |
| Te | -0.71420314 | -1.10409454 | -0.30932770 |

T<sub>2T</sub>

|    |             |             |             |
|----|-------------|-------------|-------------|
| C  | -0.56976154 | 0.32288040  | 0.23974582  |
| C  | 1.15786431  | 1.86203877  | 0.05859527  |
| C  | 2.16769774  | 0.83201696  | 0.09509452  |
| C  | 1.73393684  | -0.44166054 | 0.27786581  |
| H  | 3.22141464  | 1.05616003  | -0.00388074 |
| H  | 2.39760407  | -1.29665190 | 0.34498108  |
| H  | 0.08013975  | -1.62491935 | 0.61490676  |
| N  | 1.55660085  | 3.18168903  | 0.07391814  |
| H  | 2.45816510  | 3.38147628  | -0.33329601 |
| H  | 0.82761983  | 3.82678910  | -0.20109167 |
| N  | -0.13141788 | 1.60220310  | 0.05061672  |
| N  | 0.40164472  | -0.68487991 | 0.43634822  |
| Te | -2.23649418 | -0.22799315 | -1.09779364 |

T<sub>1P</sub>

|   |            |            |             |
|---|------------|------------|-------------|
| C | 0.36463596 | 0.69906178 | -0.16351501 |
| C | 2.36623106 | 1.83337193 | -0.09087405 |
| C | 1.70604243 | 3.04956756 | 0.04627354  |
| C | 0.32119761 | 3.09759809 | 0.10417429  |
| H | 2.27478694 | 3.97410202 | 0.07828098  |

|    |             |             |             |
|----|-------------|-------------|-------------|
| H  | -0.27940605 | 3.99510662  | 0.14893182  |
| H  | -1.35408521 | 1.79054515  | 0.17129164  |
| N  | 3.76556613  | 1.72593003  | -0.19900138 |
| H  | 4.26050453  | 2.22885353  | 0.53099617  |
| H  | 4.03851375  | 0.75001847  | -0.17118206 |
| N  | 1.66108213  | 0.63926321  | -0.25533155 |
| N  | -0.36049879 | 1.86030693  | 0.00980726  |
| Te | -0.75907457 | -1.07801228 | -0.21395444 |

T<sub>IT</sub>

|    |             |             |             |
|----|-------------|-------------|-------------|
| C  | -0.58951594 | 0.35801079  | 0.26607254  |
| C  | 1.16192297  | 1.87853312  | 0.08314907  |
| C  | 2.16054414  | 0.83750161  | 0.11117545  |
| C  | 1.71315652  | -0.43768072 | 0.27412125  |
| H  | 3.21658358  | 1.05111948  | 0.01648838  |
| H  | 2.36711143  | -1.30121144 | 0.32477260  |
| H  | 0.04136722  | -1.61055362 | 0.56282926  |
| N  | 1.58366588  | 3.19534452  | 0.08348008  |
| H  | 2.45863816  | 3.36916505  | -0.39102033 |
| H  | 0.84895546  | 3.83609452  | -0.18948960 |
| N  | -0.12882158 | 1.63737403  | 0.08822873  |
| N  | 0.38171936  | -0.67231841 | 0.39949453  |
| Te | -2.15031296 | -0.35223009 | -1.07329167 |

T<sub>3P</sub>

|   |            |            |             |
|---|------------|------------|-------------|
| C | 0.33214378 | 0.68059062 | -0.18493777 |
| C | 2.35558401 | 1.77396329 | -0.08468416 |
| C | 1.72622646 | 3.03418821 | 0.06558806  |

|    |             |             |             |
|----|-------------|-------------|-------------|
| C  | 0.33042655  | 3.06141535  | 0.12309450  |
| H  | 2.30094046  | 3.95079069  | 0.11572642  |
| H  | -0.27280347 | 3.95173461  | 0.23803173  |
| H  | -1.35228249 | 1.86244282  | 0.04309212  |
| N  | 3.73005457  | 1.69150430  | -0.19871117 |
| H  | 4.24215266  | 2.39726563  | 0.30959671  |
| H  | 4.07205479  | 0.75319592  | -0.03779046 |
| N  | 1.68455302  | 0.60983090  | -0.18873189 |
| N  | -0.34503941 | 1.87480659  | 0.00769843  |
| Te | -0.79851015 | -1.07600903 | -0.21207522 |

$(S_2/S_1/T_3/T_2/T_1)_P$

|    |             |             |             |
|----|-------------|-------------|-------------|
| C  | 0.34308133  | 0.66982621  | -0.15381259 |
| C  | 2.35980332  | 1.78043319  | -0.06062958 |
| C  | 1.72230191  | 3.03622851  | 0.09188642  |
| C  | 0.32055334  | 3.06291567  | 0.10847901  |
| H  | 2.28583345  | 3.95596096  | 0.17955395  |
| H  | -0.28185464 | 3.95319255  | 0.22061739  |
| H  | -1.35362278 | 1.83272445  | 0.01473604  |
| N  | 3.73349383  | 1.67922606  | -0.16428841 |
| H  | 4.29356335  | 2.42550749  | 0.21415965  |
| H  | 4.09995513  | 0.74640533  | -0.05219315 |
| N  | 1.68243702  | 0.60502616  | -0.17174013 |
| N  | -0.34562410 | 1.86971535  | -0.02329731 |
| Te | -0.85442036 | -1.05144203 | -0.20757400 |

$(S_2/S_1/T_2/T_1)_P$

|   |            |            |             |
|---|------------|------------|-------------|
| C | 0.38071943 | 0.69921298 | -0.13244956 |
|---|------------|------------|-------------|

|    |             |             |             |
|----|-------------|-------------|-------------|
| C  | 2.36669856  | 1.83973094  | -0.08427609 |
| C  | 1.73178237  | 3.03484309  | 0.06259827  |
| C  | 0.32166417  | 3.07249157  | 0.11755387  |
| H  | 2.28576322  | 3.95227010  | 0.12955474  |
| H  | -0.27412729 | 3.94942146  | 0.23852107  |
| H  | -1.32089669 | 1.79810010  | 0.05719069  |
| N  | 3.74647568  | 1.67328003  | -0.23085237 |
| H  | 4.28494760  | 2.38270393  | 0.21507529  |
| H  | 4.03701660  | 0.76863822  | 0.07209047  |
| N  | 1.65002190  | 0.62596639  | -0.18725805 |
| N  | -0.33261651 | 1.84931220  | 0.01575348  |
| Te | -0.87195313 | -1.08025796 | -0.27760461 |

$(S_2/S_1/T_2)_T$

|    |             |             |             |
|----|-------------|-------------|-------------|
| C  | -0.55155696 | 0.36982138  | 0.41374080  |
| C  | 1.21167783  | 1.85161261  | 0.08477653  |
| C  | 2.15825888  | 0.84228195  | 0.13191699  |
| C  | 1.71057596  | -0.45871665 | 0.33870849  |
| H  | 3.21632844  | 1.04120290  | 0.00800790  |
| H  | 2.34746708  | -1.33533029 | 0.30298557  |
| H  | -0.02117272 | -1.59133150 | 0.42837733  |
| N  | 1.54504759  | 3.17754308  | 0.00618200  |
| H  | 2.43091194  | 3.42006670  | -0.40706619 |
| H  | 0.76351890  | 3.76099168  | -0.26100413 |
| N  | -0.13000828 | 1.61845477  | 0.19997479  |
| N  | 0.39583173  | -0.66386090 | 0.42704075  |
| Te | -2.01186614 | -0.24358690 | -1.11763054 |

$(T_2/T_1/S_0)_T$

|    |             |             |             |
|----|-------------|-------------|-------------|
| C  | -0.59862453 | 0.35969531  | 0.51144949  |
| C  | 1.17381370  | 1.85540694  | 0.09992154  |
| C  | 2.15989027  | 0.82693320  | 0.05406546  |
| C  | 1.71357417  | -0.44634180 | 0.29393033  |
| H  | 3.20409273  | 1.02765848  | -0.14391131 |
| H  | 2.36066074  | -1.31698647 | 0.27995098  |
| H  | 0.06957342  | -1.58839119 | 0.69912742  |
| N  | 1.56230388  | 3.16936777  | 0.04055416  |
| H  | 2.43801684  | 3.37412740  | -0.41552376 |
| H  | 0.80936012  | 3.81248609  | -0.16403004 |
| N  | -0.13136072 | 1.61717592  | 0.25395664  |
| N  | 0.40534324  | -0.64277953 | 0.57809499  |
| Te | -2.10162962 | -0.25920327 | -1.53157560 |
